# Supplementary material for: Excited-state intramolecular proton-transfer solid-state fluorophores with aggregation-induced emission as efficient emitters for electroluminescent devices
Source: Royal Society of Chemistry journal article supplement (doi:10.1039/d4ce00660g), 2024-01-01

## Supporting Information

### Excited-state intramolecular proton-transfer solid-state fluorophores with aggregation-induced emission as efficient emitters for electroluminescent devices

Sujinda Petdee,<sup>a</sup> Nuttapong Chantanop,<sup>a</sup> Suangsiri Arunlimsawat,<sup>a</sup> Atthapon Saenubol,<sup>a</sup> Phattananawee Nalaoh,<sup>a</sup> Taweesak Sudyoadsuk<sup>b</sup> and Vinich Promarak\*<sup>a</sup> □□□□□□

<sup>a</sup> Department of Materials Science and Engineering, School of Molecular Science and Engineering, Vidyasirimedhi Institute of Science and Technology, Wangchan, Rayong 21210, Thailand.

<sup>b</sup> Frontier Research Center, Vidyasirimedhi Institute of Science and Technology, Wangchan, Rayong 21210, Thailand.

E-mail: [vinich.p@vistec.ac.th](mailto:vinich.p@vistec.ac.th)

---

#### 1. Single-crystal XRD data

CCDC 2144527 and 2130190 of **PPy-HPI** and **PPy-HPIC**, respectively, contain the supplementary crystallographic data for this paper. These data can be obtained free of charge from The Cambridge Crystallographic Data Centre via [www.ccdc.cam.ac.uk/data\\_request/cif](http://www.ccdc.cam.ac.uk/data_request/cif).

**Table S1** Crystal data and structure refinement for **PPy-HPI** and **PPy-HPIC**.

| Compound               | PPy-HPI                                          | PPy-HPIC                                         |
|------------------------|--------------------------------------------------|--------------------------------------------------|
| CCDC deposition number | 2144527                                          | 2130190                                          |
| Empirical formula      | C <sub>41</sub> H <sub>31</sub> N <sub>3</sub> O | C <sub>41</sub> H <sub>29</sub> N <sub>3</sub> O |
| Formula weight         | 581.69                                           | 579.67                                           |
| Temperature/K          | 100.0                                            | 100.0                                            |
| Crystal system         | triclinic                                        | monoclinic                                       |
| Space group            | P-1                                              | P2 <sub>1</sub> /n                               |
| a/Å                    | 10.6202(17)                                      | 12.6993(11)                                      |
| b/Å                    | 11.1341(18)                                      | 16.3312(14)                                      |
| c/Å                    | 13.581(2)                                        | 14.3395(11)                                      |
| α/°                    | 106.157(5)                                       | 90                                               |
| β/°                    | 97.582(5)                                        | 100.320(3)                                       |

|                                               |                                                                              |                                                                              |
|-----------------------------------------------|------------------------------------------------------------------------------|------------------------------------------------------------------------------|
| $\gamma/^\circ$                               | 98.728(6)                                                                    | 90                                                                           |
| Volume/ $\text{\AA}^3$                        | 1498.7(4)                                                                    | 2925.8(4)                                                                    |
| Z                                             | 2                                                                            | 4                                                                            |
| $\rho_{\text{calc}}/\text{g/cm}^3$            | 1.289                                                                        | 1.316                                                                        |
| $\mu/\text{mm}^{-1}$                          | 0.078                                                                        | 0.079                                                                        |
| F(000)                                        | 612.0                                                                        | 1216.0                                                                       |
| Crystal size/ $\text{mm}^3$                   | $0.339 \times 0.245 \times 0.216$                                            | $0.362 \times 0.251 \times 0.183$                                            |
| Radiation                                     | MoK $\alpha$ ( $\lambda = 0.71073$ )                                         | MoK $\alpha$ ( $\lambda = 0.71073$ )                                         |
| $2\Theta$ range for data collection/ $^\circ$ | 3.886 to 54.204                                                              | 3.948 to 52.744                                                              |
| Index ranges                                  | -13 $\leq$ h $\leq$ 13,<br>-14 $\leq$ k $\leq$ 14,<br>-17 $\leq$ l $\leq$ 17 | -15 $\leq$ h $\leq$ 15,<br>-20 $\leq$ k $\leq$ 20,<br>-17 $\leq$ l $\leq$ 17 |
| Reflections collected                         | 43101                                                                        | 49935                                                                        |
| Independent reflections                       | 6610 [ $R_{\text{int}} = 0.0621$ ,<br>$R_{\text{sigma}} = 0.0415$ ]          | 5972 [ $R_{\text{int}} = 0.0484$ ,<br>$R_{\text{sigma}} = 0.0288$ ]          |
| Data/restraints/parameters                    | 6610/0/439                                                                   | 5972/0/412                                                                   |
| Goodness-of-fit on $F^2$                      | 1.039                                                                        | 1.043                                                                        |
| Final R indexes [ $I \geq 2\sigma(I)$ ]       | $R_1 = 0.0462$ , $wR_2 = 0.1020$                                             | $R_1 = 0.0400$ , $wR_2 = 0.0945$                                             |
| Final R indexes [all data]                    | $R_1 = 0.0688$ , $wR_2 = 0.1131$                                             | $R_1 = 0.0505$ , $wR_2 = 0.1005$                                             |
| Largest diff. peak/hole / $e \text{\AA}^{-3}$ | 0.31/-0.33                                                                   | 0.34/-0.24                                                                   |

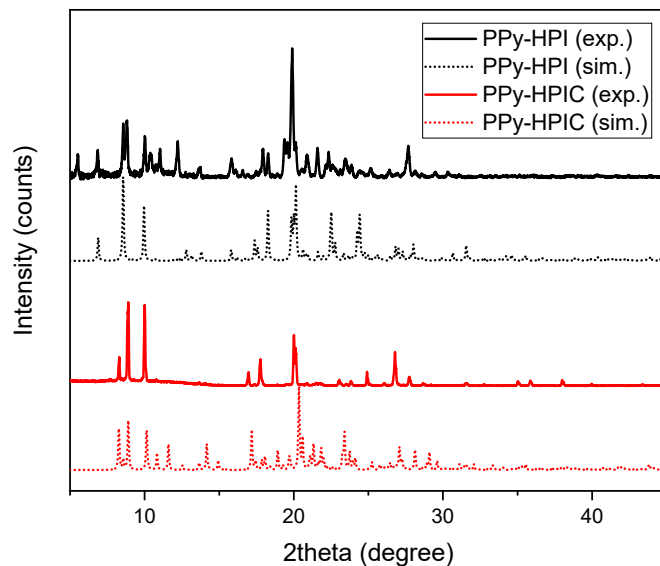

Fig. S1 Experimental and simulated PXRD data of PPy-HPI and PPy-HPIC.

## 2. Optical data

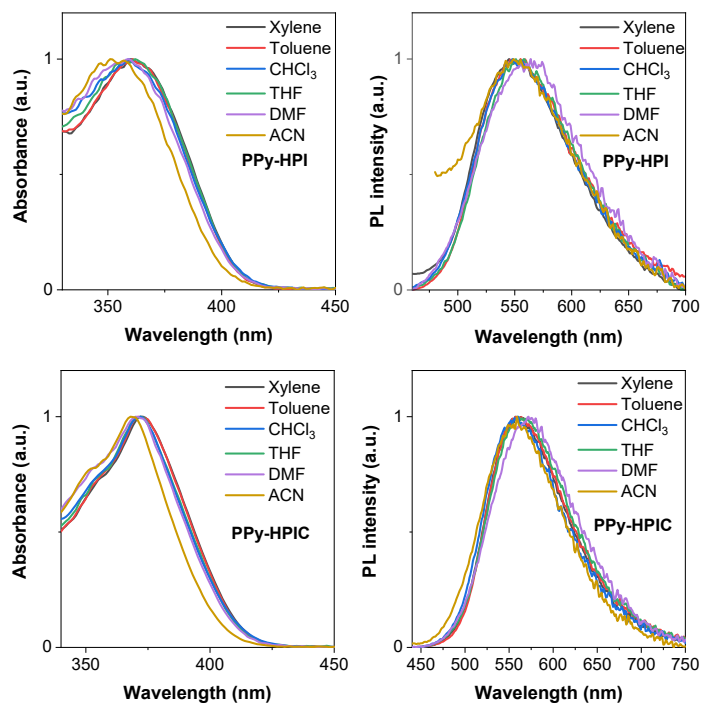

Fig. S2 UV-vis absorption and PL spectra of PPy-HPI and PPy-HPIC in various solvents.

### 3. Thermal properties

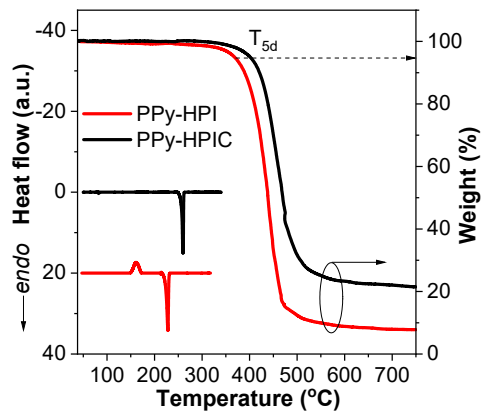

Fig S3 DSC/TGA thermograms recorded at a heating rate of  $10\text{ }^{\circ}\text{C min}^{-1}$  under  $\text{N}_2$  flow.

### 4. Electrochemical properties

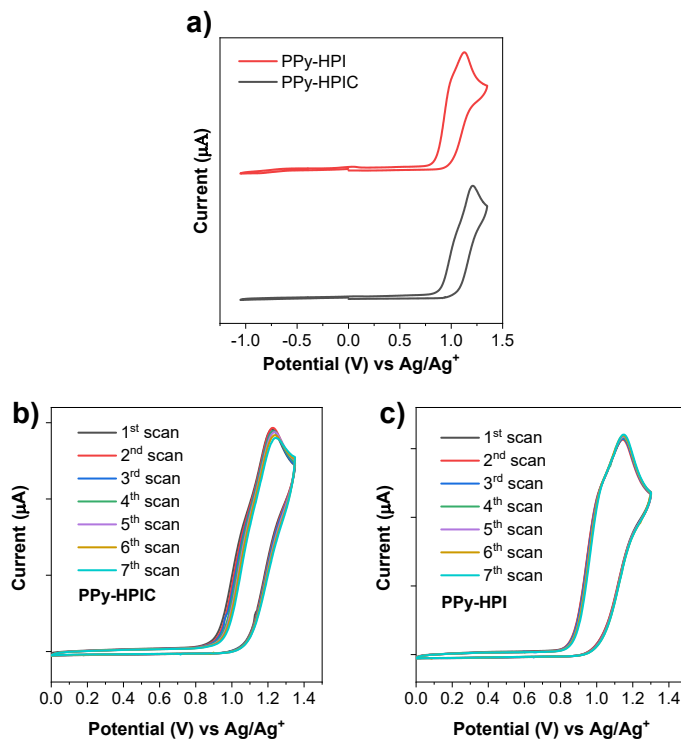

Fig. S4 (a) CV plots of PPy-HPIC and PPy-HPI and (b-c) their related multiple scan traces measured in  $\text{CH}_2\text{Cl}_2$  containing  $n\text{-Bu}_4\text{NPF}_6$  as a supporting electrolyte at a scan rate of  $50\text{ mV s}^{-1}$  under Ar atmosphere.

## 5. Charge transport properties

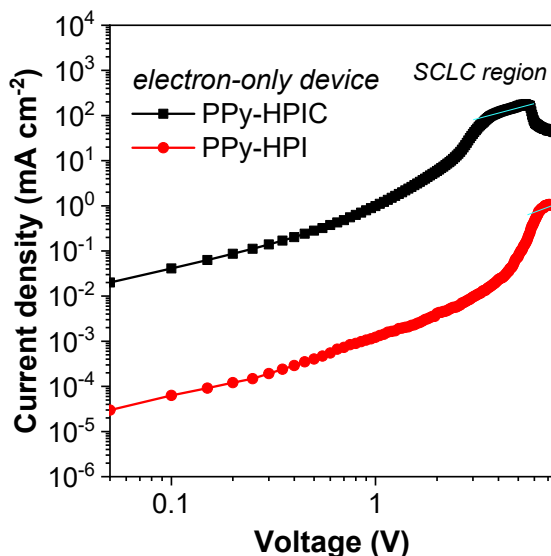

**Fig. S5** Current density-voltage ( $J$ - $V$ ) plots of the electron-only devices of PPy-HPI and PPy-HPIC.

## 6. Non-doped OLEDs

**Table S2.** Comparison of ES IPT based non-doped fluorescent OLED.

| EML      | $V_{\text{on}}$<br>(V) | $\lambda_{\text{EL}}$<br>(nm) | $\text{EQE}_{\text{max}}$<br>(%) | $\text{CE}_{\text{max}}$<br>( $\text{cd A}^{-1}$ ) | CIE (x, y) | ref       |
|----------|------------------------|-------------------------------|----------------------------------|----------------------------------------------------|------------|-----------|
| HOXD     | 7.0                    | 451                           | -                                | 0.44                                               | -          | 1         |
| W1       | 6.7                    | -                             | 0.76                             | 0.98                                               | 0.34, 0.29 | 2         |
| HBI-Cbz  | 4.8                    | 456                           | 2.94                             | 1.96                                               | 0.15, 0.11 | 3         |
| HBT-Py   | -                      | 582                           | 3.00                             | 5.32                                               | -          | 4         |
| HPITPE   | 3.0                    | 502                           | 3.26                             | 3.67                                               | 0.23, 0.39 | 5         |
| PTHPI    | 3.3                    | 496                           | 3.27                             | 8.08                                               | 0.24, 0.38 | 6         |
| *PPy-HPI | 3.0                    | 553                           | 3.61                             | 10.56                                              | 0.41, 0.54 | This work |

- 1 F. Liang, L. Wang, D. Ma, X. Jing and F. Wang, *Appl Phys Lett*, 2002, **81**, 4–6.
- 2 S. Park, J. E. Kwon, S. H. Kim, J. Seo, K. Chung, S.-Y. Park, D.-J. Jang, B. M. Medina, J. Gierschner and S. Y. Park, *J Am Chem Soc*, 2009, **131**, 14043–14049.
- 3 S. Park, J. Seo, S. H. Kim and S. Y. Park, *Adv Funct Mater*, 2008, **18**, 726–731.
- 4 Y. Niu, R. Wang, L. Pu and Y. Zhang, *Dyes and Pigments*, 2019, **170**, 107594.

- 5 S. Petdee, C. Chaiwai, W. Benchaphanthawee, P. Nalaoh, N. Kungwan, S. Namuangruk, T. Sudyoadsuk and V. Promarak, *Dyes and Pigments*, 2021, **193**, 109488.
- 6 J. Kumsampao, C. Chaiwai, C. Sukpattanacharoen, P. Nalaoh, T. Chawanpunyawat, P. Chasing, S. Namuangruk, N. Kungwan, T. Sudyoadsuk and V. Promarak, *Adv Photonics Res*, 2022, **3**, 2100141.

Fig. S4 Copies of H-NMR, C-NMR and HRMS spectra

1H and 13C NMR of compound 2

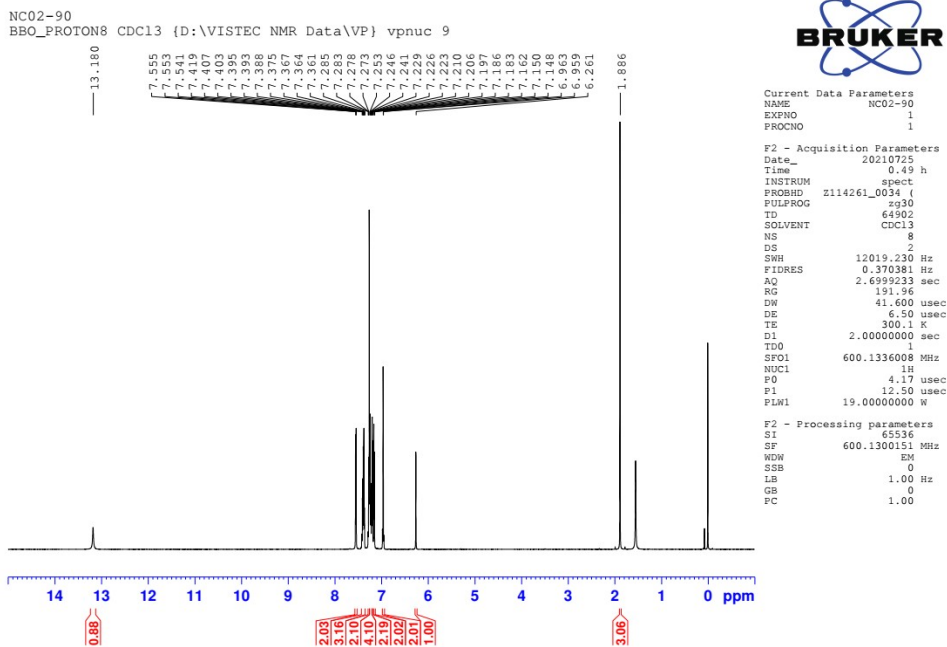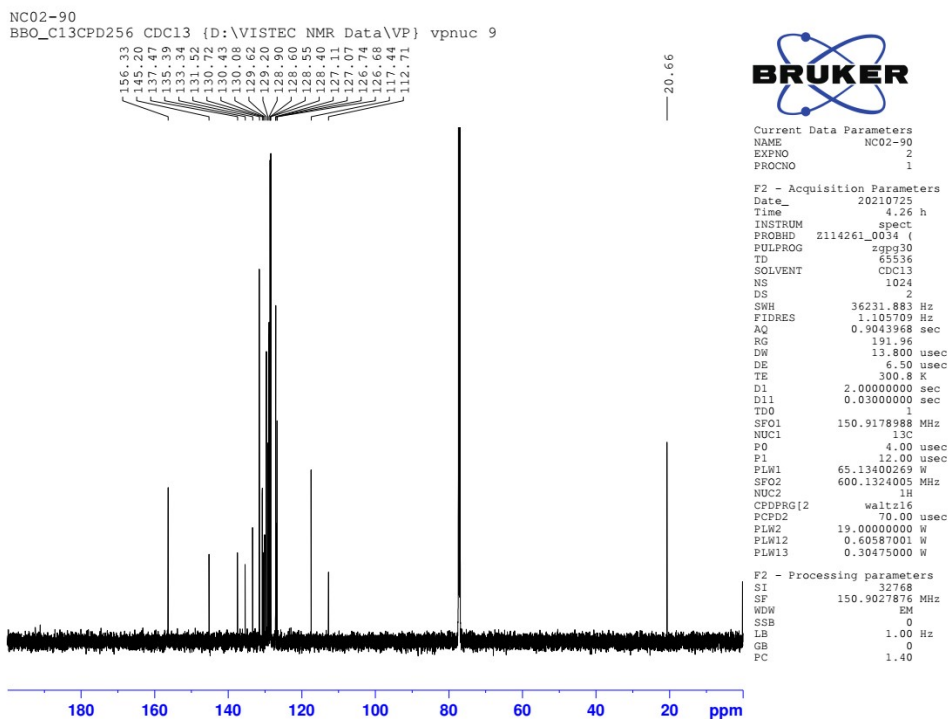

# 1H and 13C NMR of compound 4

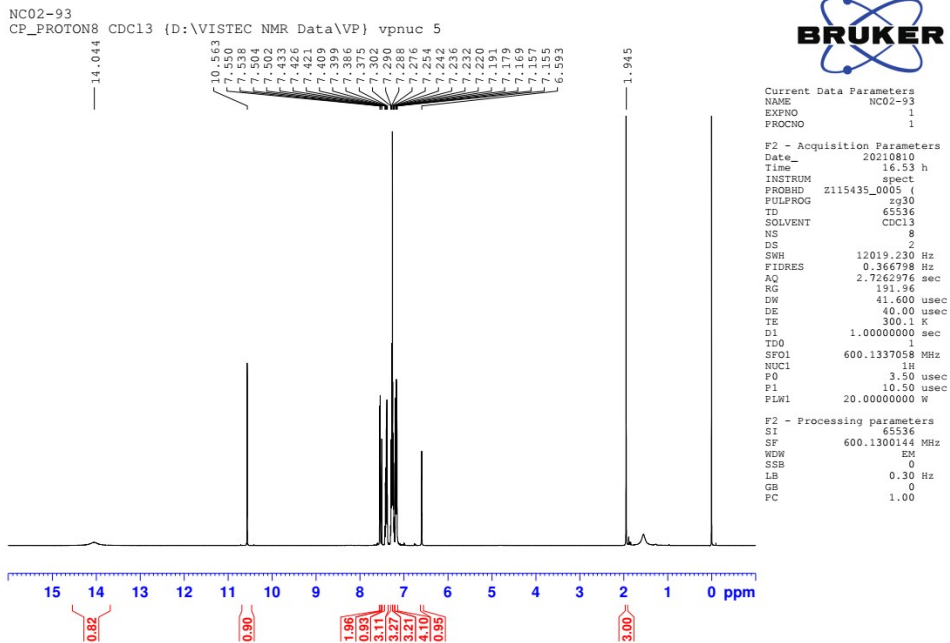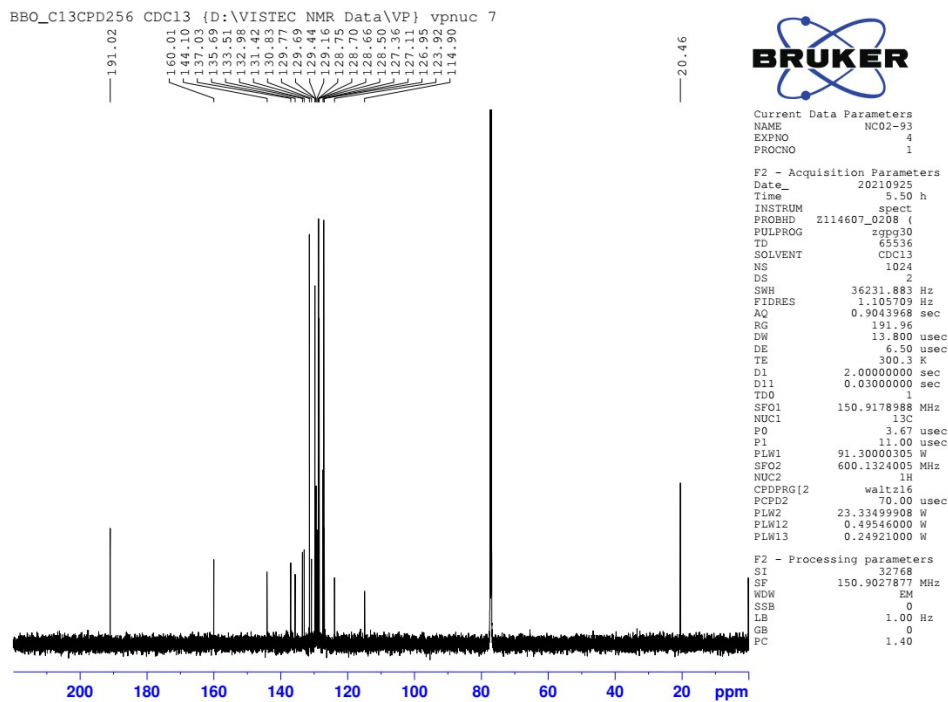



# 1H and 13C NMR of compound 7

BBO\_1H MeOD (D:\VISTEC NMR Data\VP) vprnc 15

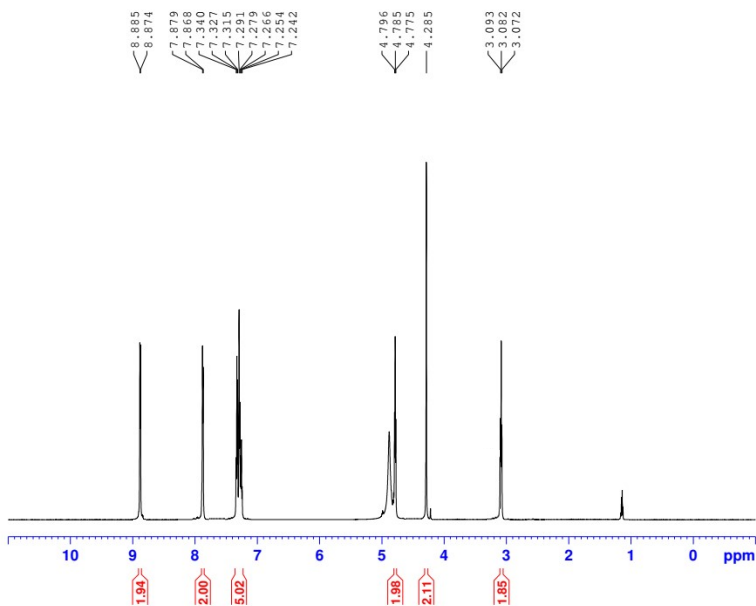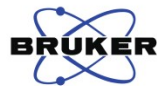

Current Data Parameters  
 NAME NC02-96  
 EXPNO 3  
 PROCNO 1

F2 - Acquisition Parameters  
 Date\_ 20230628  
 Time 16.03 h  
 INSTRUM spect  
 PROBHD Z115435\_0005 ( )  
 PULPROG zg30  
 ID 65536  
 SOLVENT MeOD  
 NS 8  
 DS 2  
 SWH 12019.230 Hz  
 FIDRES 0.366798 Hz  
 AQ 2.7262976 sec  
 RG 31.68  
 DW 41.600 usec  
 DE 21.24 usec  
 TE 294.5 K  
 D1 1.0000000 sec  
 TDO 1  
 SFO1 600.1328206 MHz  
 NUC1 1H  
 P0 4.17 usec  
 F1 12.50 usec  
 PLW1 20.0000000 W

F2 - Processing parameters  
 SI 65536  
 SF 600.1300343 MHz  
 WDW EM  
 SSB 0  
 LB 0.30 Hz  
 GB 0  
 PC 1.00

BBO\_C13CPD MeOD (D:\VISTEC NMR Data\VP) vprnc 15

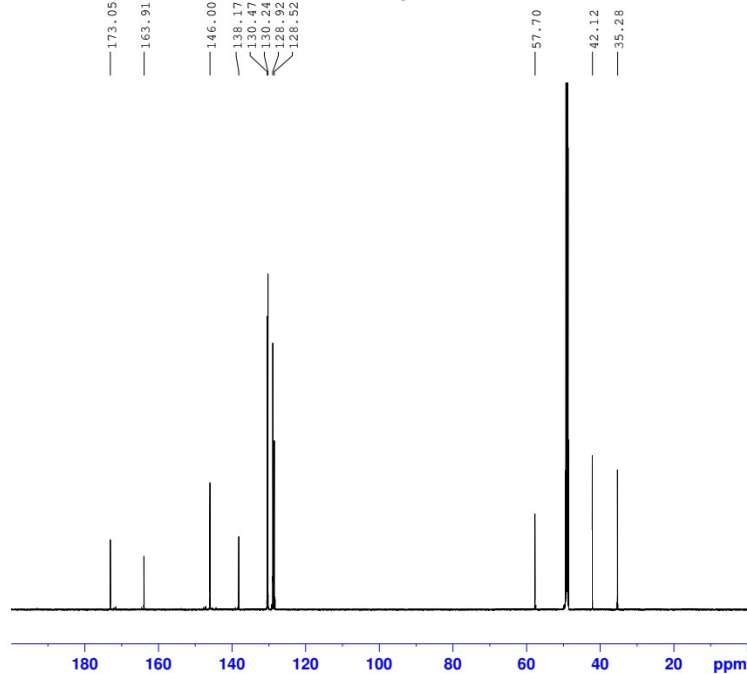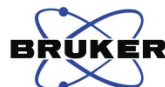

Current Data Parameters  
 NAME NC02-96  
 EXPNO 4  
 PROCNO 1

F2 - Acquisition Parameters  
 Date\_ 20230628  
 Time 16.17 h  
 INSTRUM spect  
 PROBHD Z115435\_0005 ( )  
 PULPROG zgpg30  
 ID 65536  
 SOLVENT MeOD  
 NS 256  
 DS 2  
 SWH 36231.883 Hz  
 FIDRES 1.105709 Hz  
 AQ 0.9043968 sec  
 RG 191.96  
 DW 13.800 usec  
 DE 18.00 usec  
 TE 294.7 K  
 D1 2.0000000 sec  
 D11 0.0300000 sec  
 TDO 1  
 SFO1 150.9178988 MHz  
 NUC1 13C  
 P0 3.57 usec  
 F1 10.70 usec  
 PLW1 29.0000000 W  
 SFO2 600.1324005 MHz  
 NUC2 1H  
 CPDPRG2 waltz16  
 PCPD2 70.00 usec  
 PLW2 20.0000000 W  
 PLW12 0.6375998 W  
 PLW13 0.32078999 W

F2 - Processing parameters  
 SI 32768  
 SF 150.9026043 MHz  
 WDW EM  
 SSB 0  
 LB 1.00 Hz  
 GB 0  
 PC 1.40

# 1H and 13C NMR of compound 3

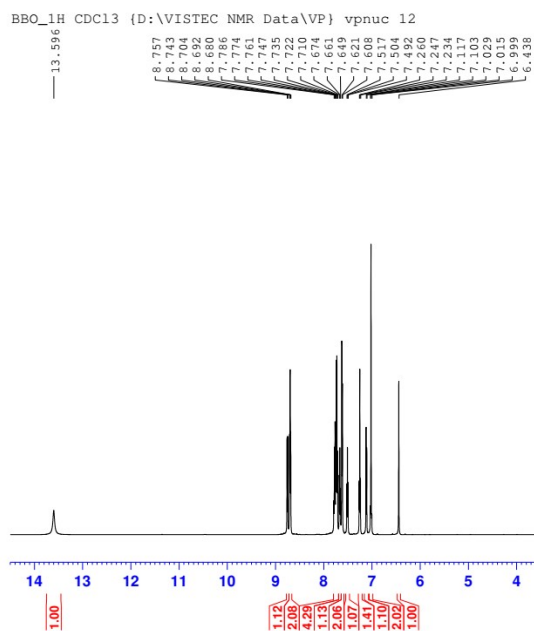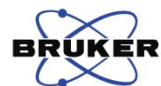

Current Data Parameters  
 NAME NC02-101-01072023  
 EXPNO 1  
 PROCNO 1

F2 - Acquisition Parameters  
 Date\_ 20230701  
 Time 23.55 h  
 INSTRUM spect  
 PROBHD Z115435\_0005 ( )  
 PULPROG zg30  
 TD 65536  
 SOLVENT CDC13  
 NS 8  
 DS 2  
 SWH 12019.230 Hz  
 FIDRES 0.366798 Hz  
 AQ 2.7262976 sec  
 RG 31.68  
 DW 41.600 usec  
 DE 21.24 usec  
 TE 295.6 K  
 D1 1.0000000 sec  
 TD0 1  
 SFO1 600.1328206 MHz  
 NUC1 1H  
 FO 417 usec  
 F1 12.50 usec  
 PLW1 20.0000000 W

F2 - Processing parameters  
 SI 65536  
 SF 600.1300213 MHz  
 WDW EM  
 SSB 0  
 LB 0.30 Hz  
 GB 0  
 PC 1.00

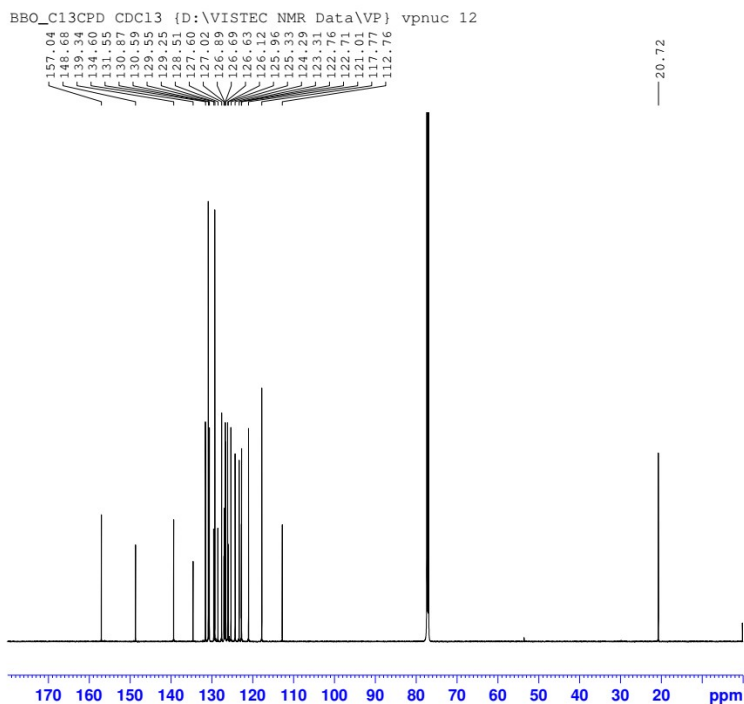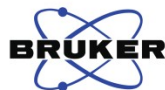

Current Data Parameters  
 NAME NC02-101-01072023  
 EXPNO 2  
 PROCNO 1

F2 - Acquisition Parameters  
 Date\_ 20230702  
 Time 7.07 h  
 INSTRUM spect  
 PROBHD Z115435\_0005 ( )  
 PULPROG zgpg30  
 TD 65536  
 SOLVENT CDC13  
 NS 2048  
 DS 2  
 SWH 36231.883 Hz  
 FIDRES 1.105709 Hz  
 AQ 0.9043968 sec  
 RG 191.96  
 DW 13.800 usec  
 DE 18.00 usec  
 TE 294.7 K  
 D1 2.0000000 sec  
 D11 0.0300000 sec  
 TD0 1  
 SFO1 150.9178988 MHz  
 NUC1 13C  
 FO 3.57 usec  
 P1 10.70 usec  
 PLW1 29.0000000 W  
 SFO2 600.1324005 MHz  
 NUC2 1H  
 CPDPRG[2] waltz16  
 PCPD2 70.00 usec  
 PLW2 20.0000000 W  
 PLW12 0.6377598 W  
 PLW13 0.32078999 W

F2 - Processing parameters  
 SI 32768  
 SF 150.9027932 MHz  
 WDW EM  
 SSB 0  
 LB 1.00 Hz  
 GB 0  
 PC 1.40

# 1H and 13C NMR of compound 5

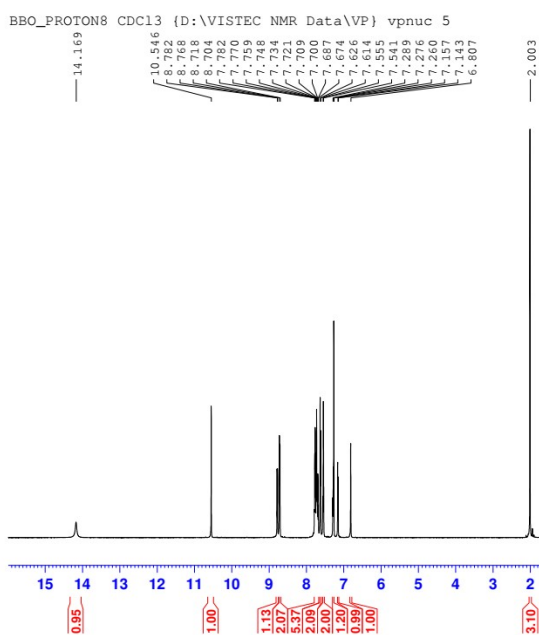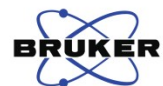

Current Data Parameters  
 NAME NC02-102  
 EXPNO 1  
 PROCNO 1

F2 - Acquisition Parameters  
 Date\_ 20211114  
 Time 23.30 h  
 INSTRUM spect  
 PROBHD Z114607\_0208 ( )  
 PULPROG zg30  
 TD 64902  
 SOLVENT CDC13  
 NS 8  
 DS 2  
 SWH 12019.230 Hz  
 FIDRES 0.370381 Hz  
 AQ 2.6999233 sec  
 RG 116.94  
 DW 41.600 usec  
 DE 6.50 usec  
 TE 303.2 K  
 D1 2.0000000 sec  
 TD0 1  
 SFO1 600.1336008 MHz  
 NUC1 1H  
 FO 3.40 usec  
 F1 10.20 usec  
 PLW1 23.33499908 W

F2 - Processing parameters  
 SI 65536  
 SF 600.1300152 MHz  
 WDW EM  
 SSB 0  
 LB 1.00 Hz  
 GB 0  
 PC 1.00

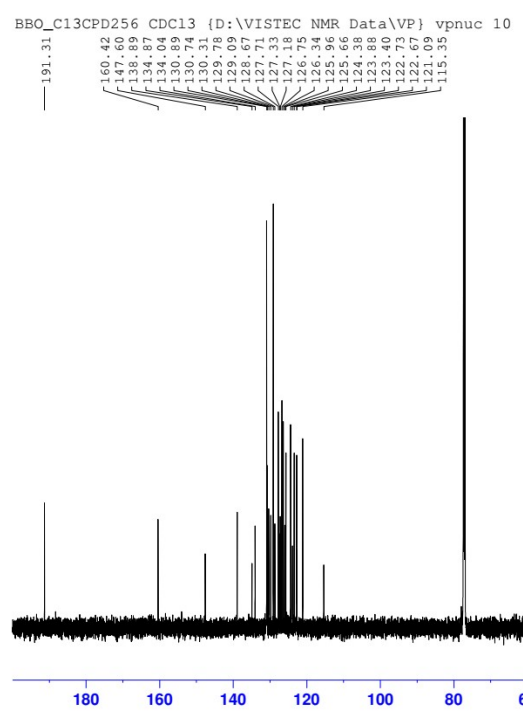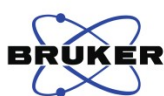

Current Data Parameters  
 NAME NC02-102  
 EXPNO 2  
 PROCNO 1

F2 - Acquisition Parameters  
 Date\_ 20211119  
 Time 2.02 h  
 INSTRUM spect  
 PROBHD Z114607\_0208 ( )  
 PULPROG zgpg30  
 TD 65536  
 SOLVENT CDC13  
 NS 1024  
 DS 2  
 SWH 36231.883 Hz  
 FIDRES 1.105709 Hz  
 AQ 0.9043968 sec  
 RG 191.96  
 DW 13.800 usec  
 DE 6.50 usec  
 TE 303.2 K  
 D1 2.0000000 sec  
 D11 0.0300000 sec  
 TD0 1  
 SFO1 150.9178988 MHz  
 NUC1 13C  
 FO 3.67 usec  
 P1 11.00 usec  
 PLW1 91.30000305 W  
 SFO2 600.1324005 MHz  
 NUC2 1H  
 CPDPRG[2] waltz16  
 PCPD2 70.00 usec  
 PLW2 23.33499908 W  
 PLW12 0.49546000 W  
 PLW13 0.24921000 W

F2 - Processing parameters  
 SI 32768  
 SF 150.9027865 MHz  
 WDW EM  
 SSB 0  
 LB 1.00 Hz  
 GB 0  
 PC 1.40

# 1H and 13C NMR of compound PPy-HPI

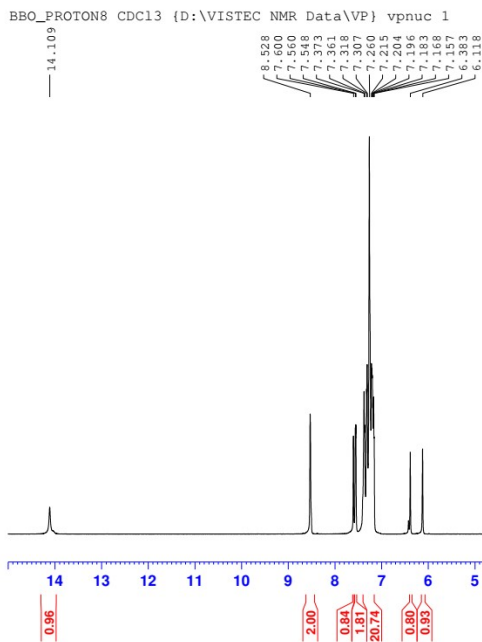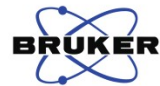

Current Data Parameters  
 NAME NC02-103-1  
 EXPNO 1  
 PROCNO 1

F2 - Acquisition Parameters  
 Date\_ 20211123  
 Time 17.37 h  
 INSTRUM spect  
 PROBHD Z114607\_0208 ( )  
 PULPROG zg30  
 TD 64902  
 SOLVENT CDC13  
 NS 8  
 DS 2  
 SWH 12019.230 Hz  
 FIDRES 0.370381 Hz  
 AQ 2.6992233 sec  
 RG 107.65  
 DW 41.600 usec  
 DE 6.50 usec  
 TE 303.2 K  
 D1 2.00000000 sec  
 TD0 1  
 SFO1 600.1336008 MHz  
 NUC1 1H  
 P0 3.40 usec  
 P1 10.20 usec  
 PLW1 23.33499908 W

F2 - Processing parameters  
 SI 65536  
 SF 600.1300141 MHz  
 WDW EM  
 SSB 0  
 LB 1.00 Hz  
 GB 0  
 FC 1.00

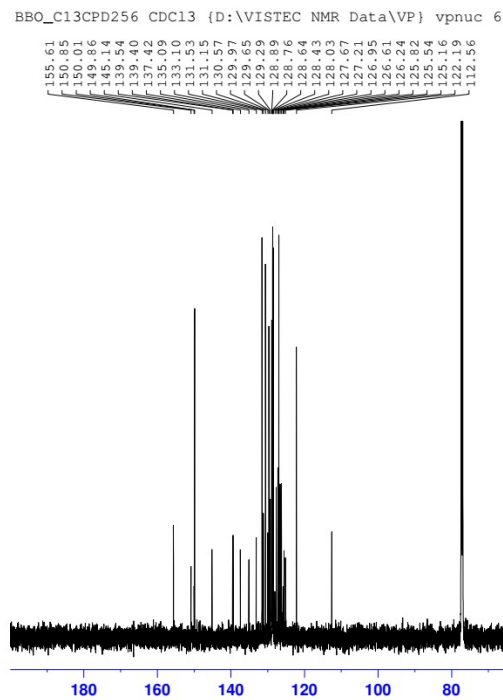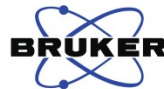

Current Data Parameters  
 NAME NC02-103-1  
 EXPNO 1  
 PROCNO 1

F2 - Acquisition Parameters  
 Date\_ 20211124  
 Time 6.35 h  
 INSTRUM spect  
 PROBHD Z114607\_0208 ( )  
 PULPROG zgpg30  
 TD 65536  
 SOLVENT CDC13  
 NS 1024  
 DS 2  
 SWH 36231.883 Hz  
 FIDRES 1.105709 Hz  
 AQ 0.9043968 sec  
 RG 191.96  
 DW 13.800 usec  
 DE 6.50 usec  
 TE 303.1 K  
 D1 2.00000000 sec  
 D11 0.03000000 sec  
 TD0 1  
 SFO1 150.9178988 MHz  
 NUC1 13C  
 P0 3.47 usec  
 P1 11.00 usec  
 PLW1 91.30000305 W  
 SFO2 600.1324005 MHz  
 NUC2 1H  
 CPDPRG[2] waltz16  
 PCPD2 70.00 usec  
 PLW2 23.33499908 W  
 PLW12 0.49546000 W  
 PLW13 0.24921000 W

F2 - Processing parameters  
 SI 32768  
 SF 150.9027864 MHz  
 WDW EM  
 SSB 0  
 LB 1.00 Hz  
 GB 0  
 FC 1.40

# 1H and 13C NMR of compound PPy-HPIC

NC03-12-7-01-2021  
BBO\_PROTON8 CDC13 {D:\VISTEC NMR Data\VP} vpnu3

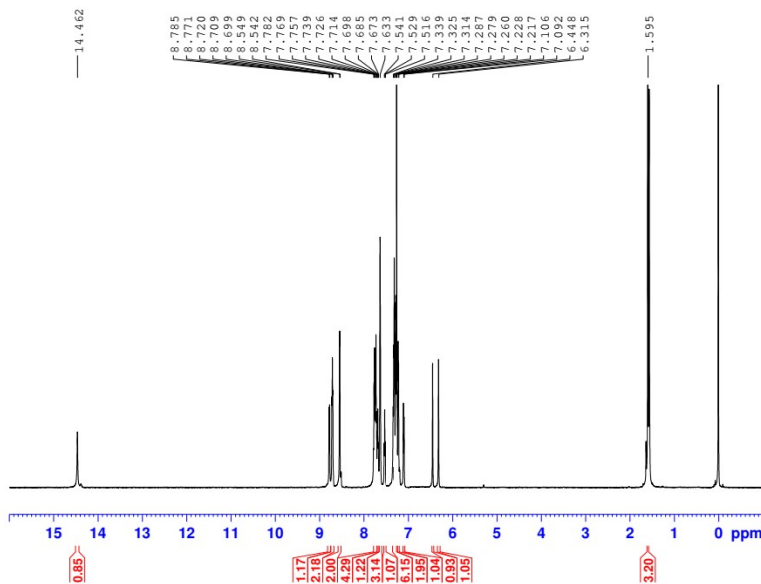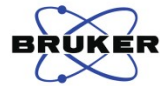

Current Data Parameters  
NAME NC03-12-7-01-2021  
EXPNO 1  
PROCNO 1

F2 - Acquisition Parameters  
Date\_ 20220107  
Time 13.47 h  
INSTRUM spect  
PROBHD z114607\_0208 (4  
PULPROG zg30  
TD 64902  
SOLVENT CDC13  
NS 8  
DS 2  
SWH 12019.230 Hz  
FIDRES 0.370381 Hz  
AQ 2.6999233 sec  
RG 130.93  
DW 41.600 usec  
DE 6.50 usec  
TE 303.1 K  
D1 2.00000000 sec  
TD0 1  
SFO1 600.1336008 MHz  
NUC1 1H  
P0 3.40 usec  
P1 10.20 usec  
PLW1 23.33499908 W

F2 - Processing parameters  
SI 65536  
SF 600.1300140 MHz  
WDW EM  
SSB 0  
LB 1.00 Hz  
GB 0  
PC 1.00

BBO\_C13CPD256 CDC13 {D:\VISTEC NMR Data\VP} vpnu3

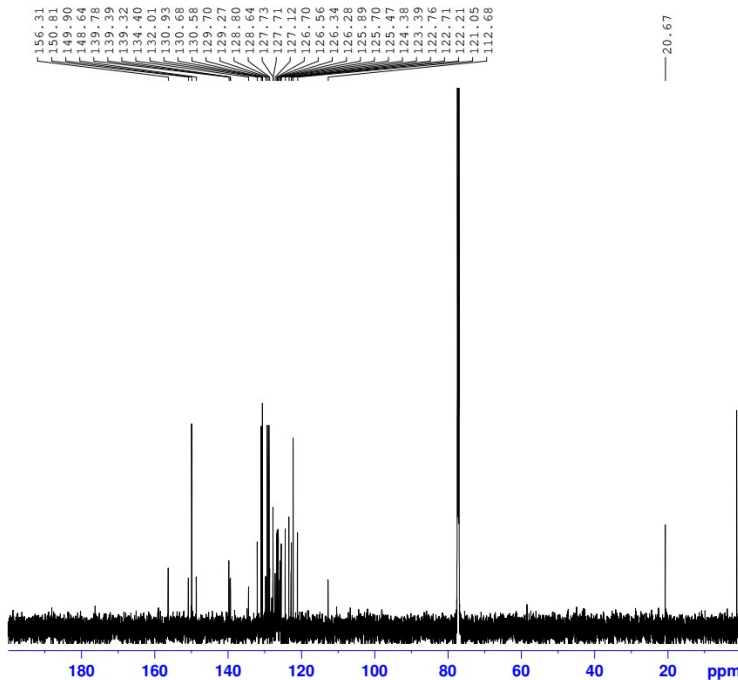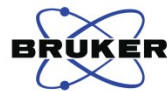

Current Data Parameters  
NAME NC03-12-2  
EXPNO 2  
PROCNO 1

F2 - Acquisition Parameters  
Date\_ 20211123  
Time 23.52 h  
INSTRUM spect  
PROBHD z114607\_0208 (4  
PULPROG zgpg30  
TD 65536  
SOLVENT CDC13  
NS 1024  
DS 2  
SWH 36231.883 Hz  
FIDRES 1.105709 Hz  
AQ 0.9043968 sec  
RG 191.96  
DW 13.800 usec  
DE 6.50 usec  
TE 303.2 K  
D1 2.00000000 sec  
D11 0.03000000 sec  
TD0 1  
SFO1 150.9178988 MHz  
NUC1 13C  
P0 3.67 usec  
P1 11.00 usec  
PLW1 91.30000305 W  
SFO2 600.1324005 MHz  
NUC2 1H  
CPDPRG2 waltz16  
PCPD2 70.00 usec  
PLW2 23.33499908 W  
PLW12 0.49546000 W  
PLW13 0.24921000 W

F2 - Processing parameters  
SI 32768  
SF 150.9027854 MHz  
WDW EM  
SSB 0  
LB 1.00 Hz  
GB 0  
PC 1.40

**Fig. S5** Copies of mass spectra

**MALDI-TOF of compound 2**

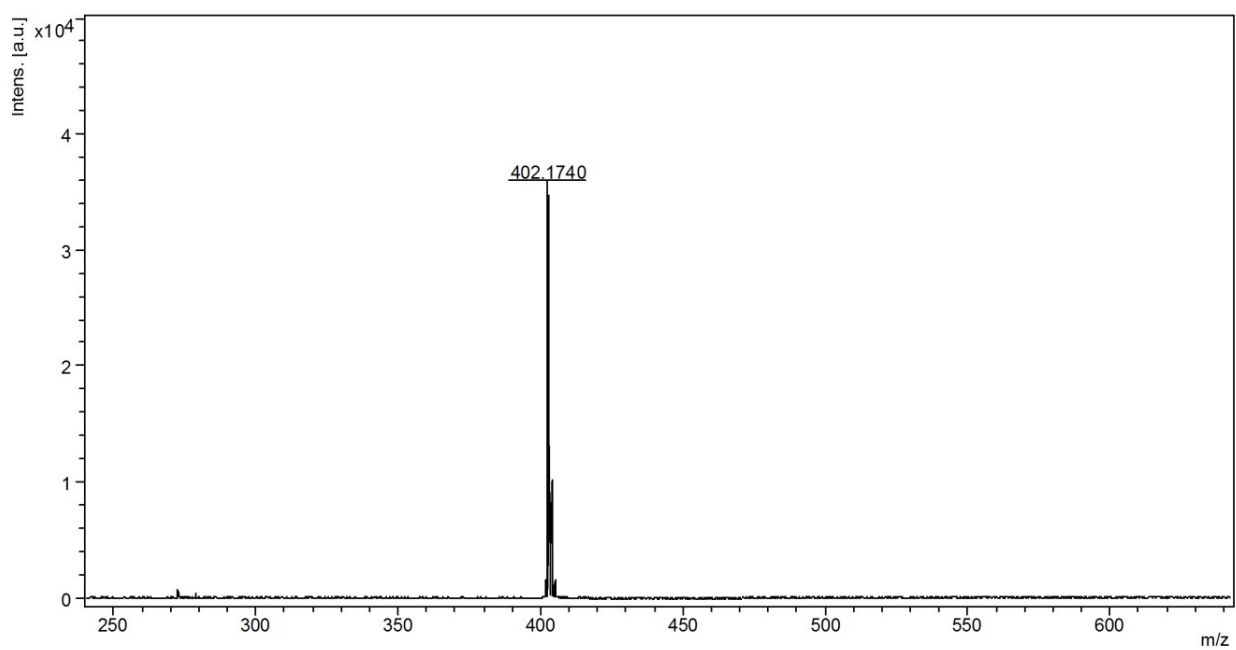

**MALDI-TOF of compound 4**

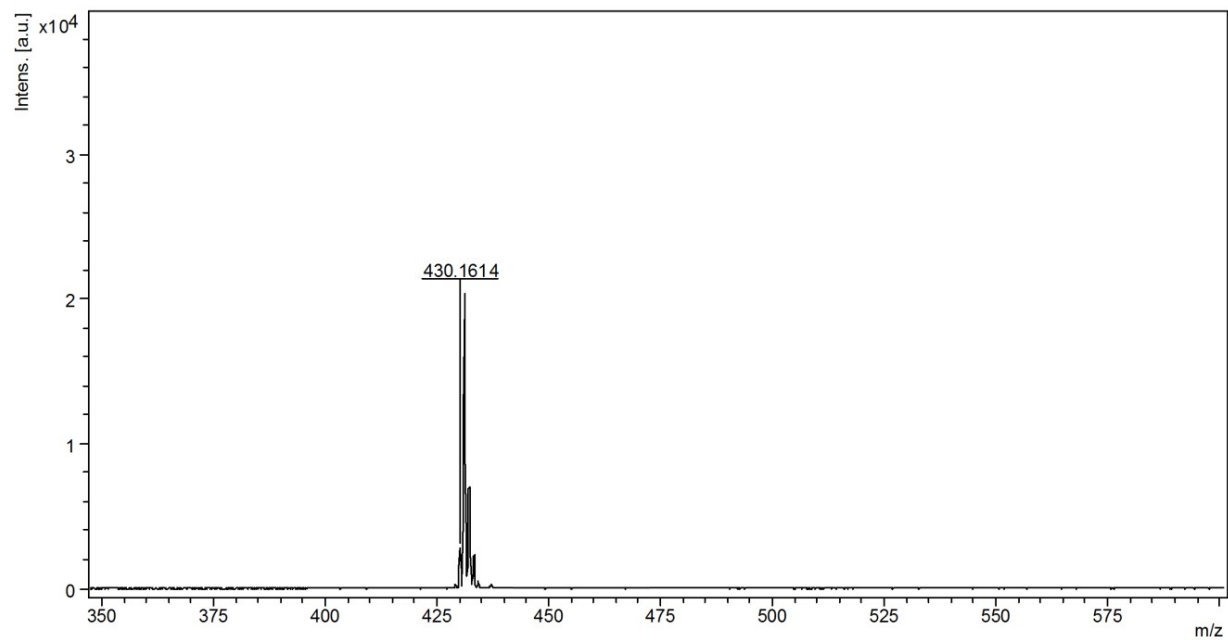

### MALDI-TOF of compound 7

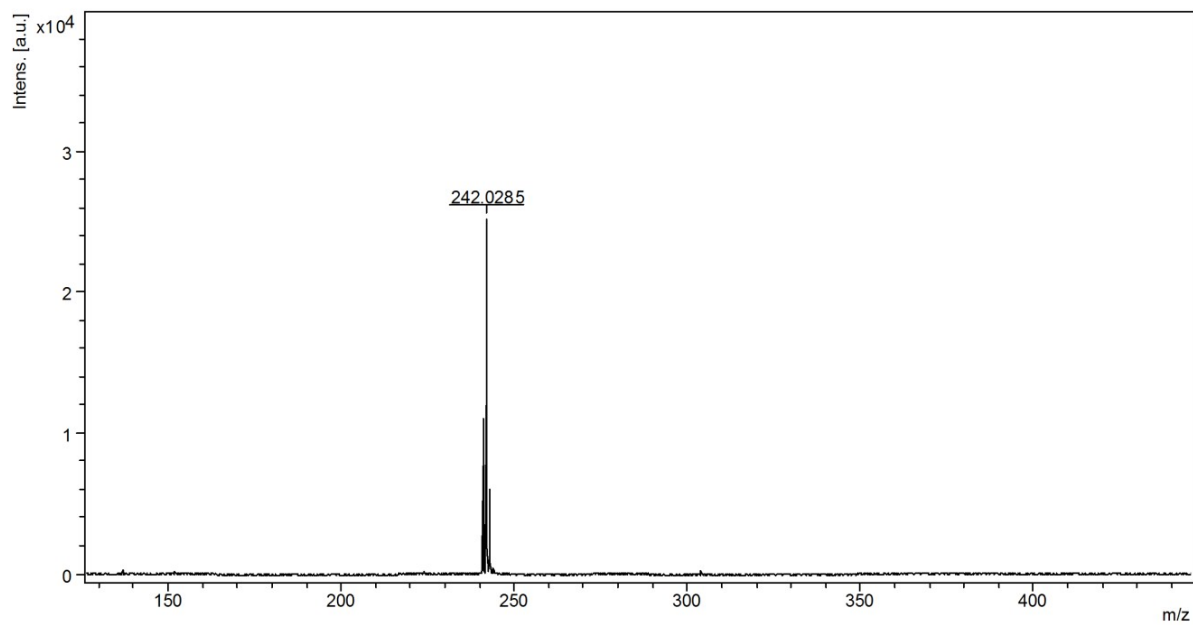

### MALDI-TOF of compound 3

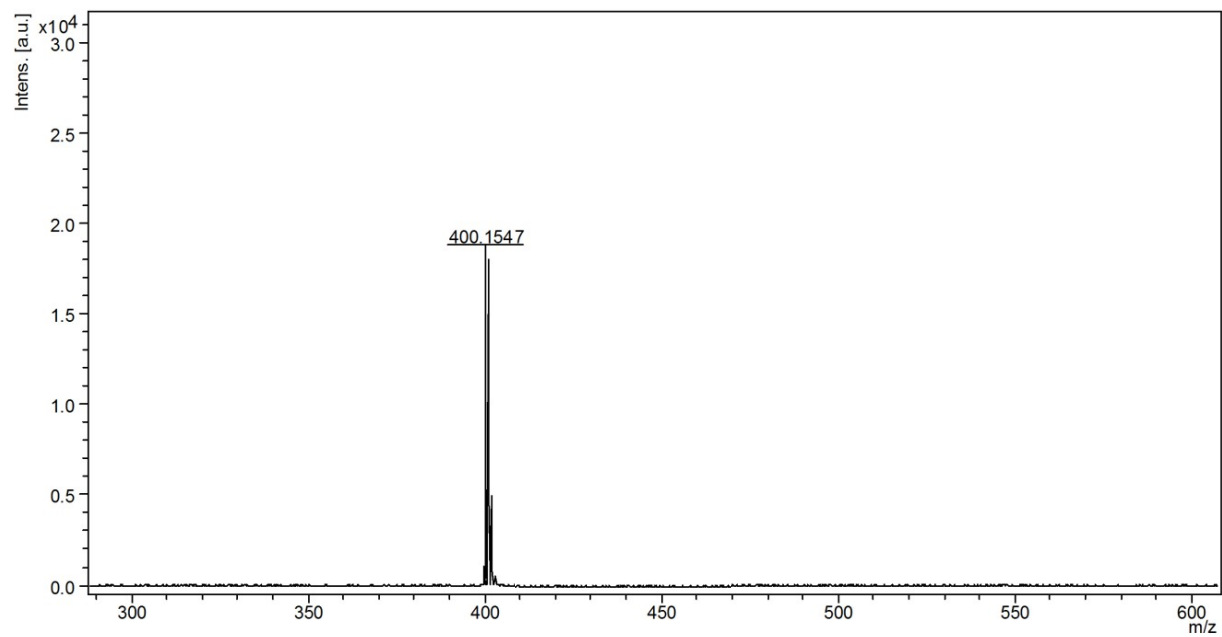

### MALDI-TOF of compound 5

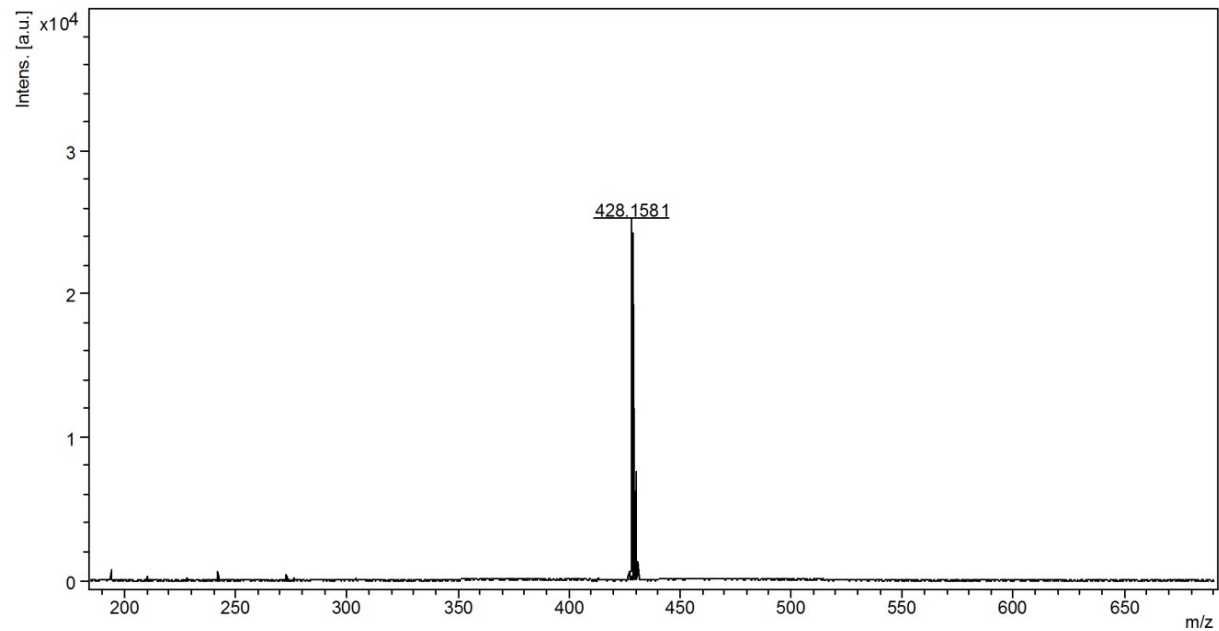

### MALDI-TOF of compound PPy-HPI

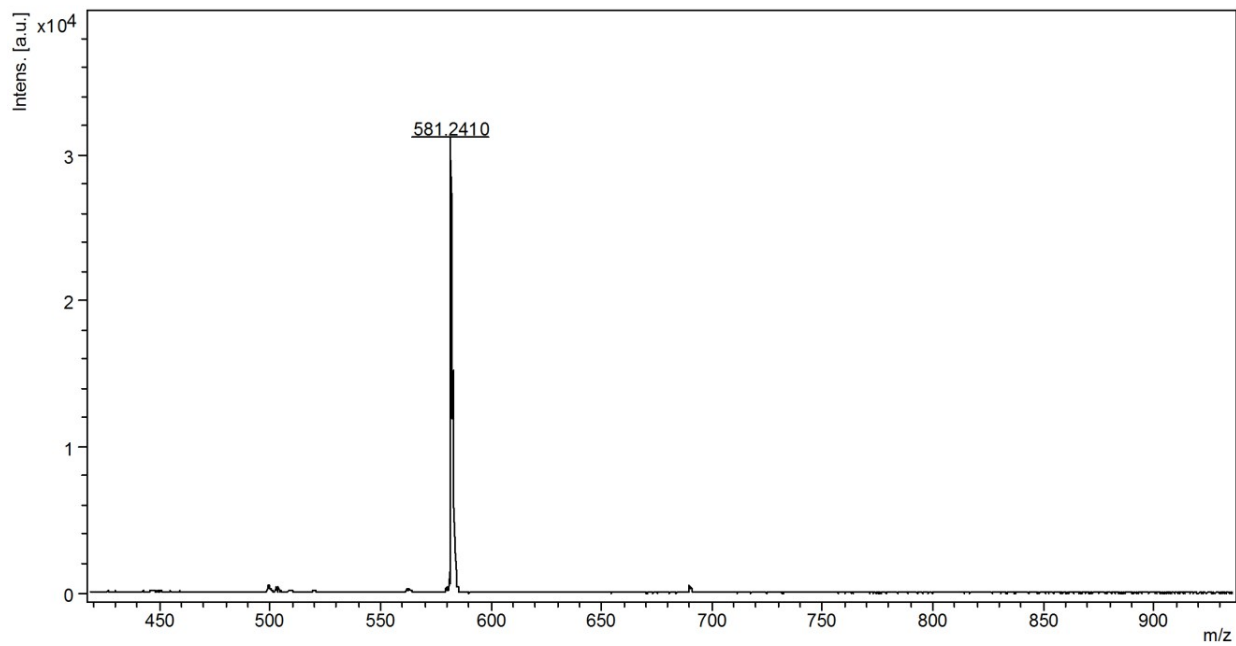



# MALDI-TOF of compound PPy-HPIC

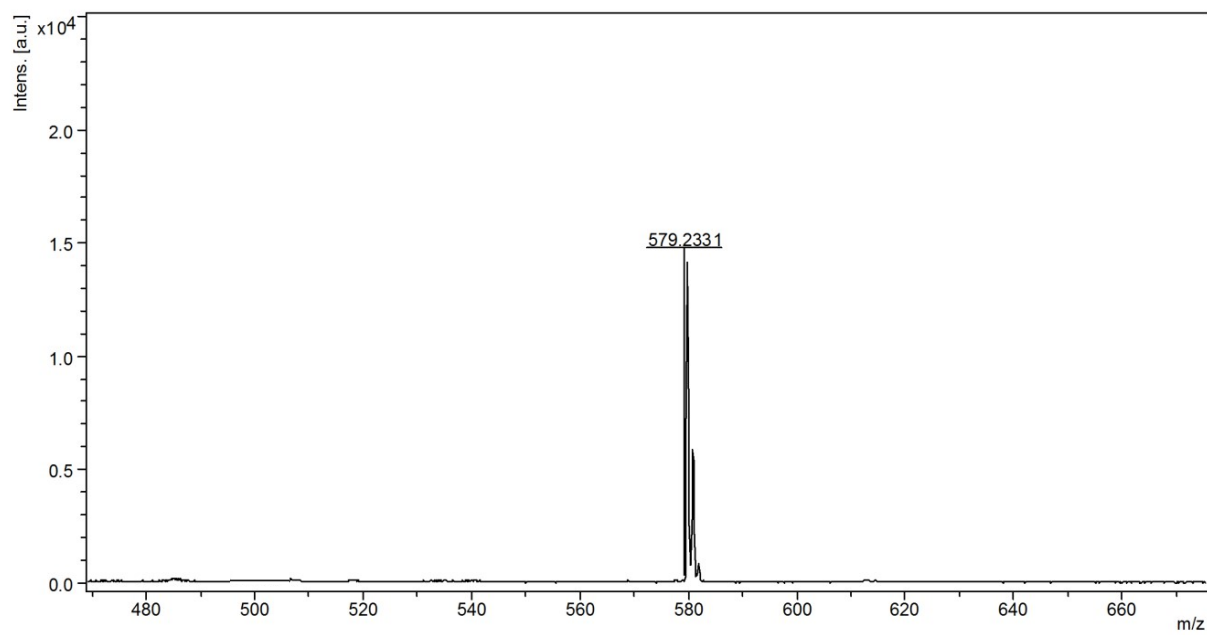

Supplement: d4ce00660g1.pdf [file d4ce00660g1.pdf]
